# Supplementary material for: Robust room temperature valley polarization in monolayer and bilayer WS2
Source: Royal Society of Chemistry journal article supplement (doi:10.1039/c5nr08395h), 2016-01-01
Supplement: c5nr08395h1.pdf [file c5nr08395h1.pdf]

**Electronic Supporting Information for**

**Robust Room Temperature Valley Polarization in Monolayer and Bilayer WS<sub>2</sub>**

Pramoda K. Nayak<sup>1,3†</sup>, Fang-Cheng Lin<sup>2‡</sup>, Chao-Hui Yeh<sup>1</sup>, Jer-Shing Huang<sup>2\*</sup>, Po-Wen Chiu<sup>1\*</sup>

<sup>1</sup>Department of Electrical Engineering, National Tsing Hua University, Hsinchu 30013, Taiwan

<sup>2</sup>Department of Chemistry, National Tsing Hua University, Hsinchu 30013, Taiwan

<sup>3</sup>Interdisciplinary School of Green Energy and Low Dimensional Carbon Materials Center, Ulsan National Institute of  
Science and Technology (UNIST), Ulsan 689-798, Republic of Korea

\*E-mail; [jshuang@mx.nthu.edu.tw](mailto:jshuang@mx.nthu.edu.tw) or [pwchiu@ee.nthu.edu.tw](mailto:pwchiu@ee.nthu.edu.tw)

Contents:

Fig. S1 Optical Images of CVD Grown Monolayer to bulk WS<sub>2</sub> on Silicon substrates

Fig. S2 SEM images of Monolayer to bulk WS<sub>2</sub>

Fig. S3 AFM profile of Monolayer to bulk WS<sub>2</sub>

Fig. S4 Schematic of the polarization resolved photoluminescence measurement set up

Fig. S5 Polarized luminescence spectra from other monolayer and bilayer WS<sub>2</sub> flakes

Fig. S6 Surface roughness of 300nm SiO<sub>2</sub>/Si and sapphire substrates

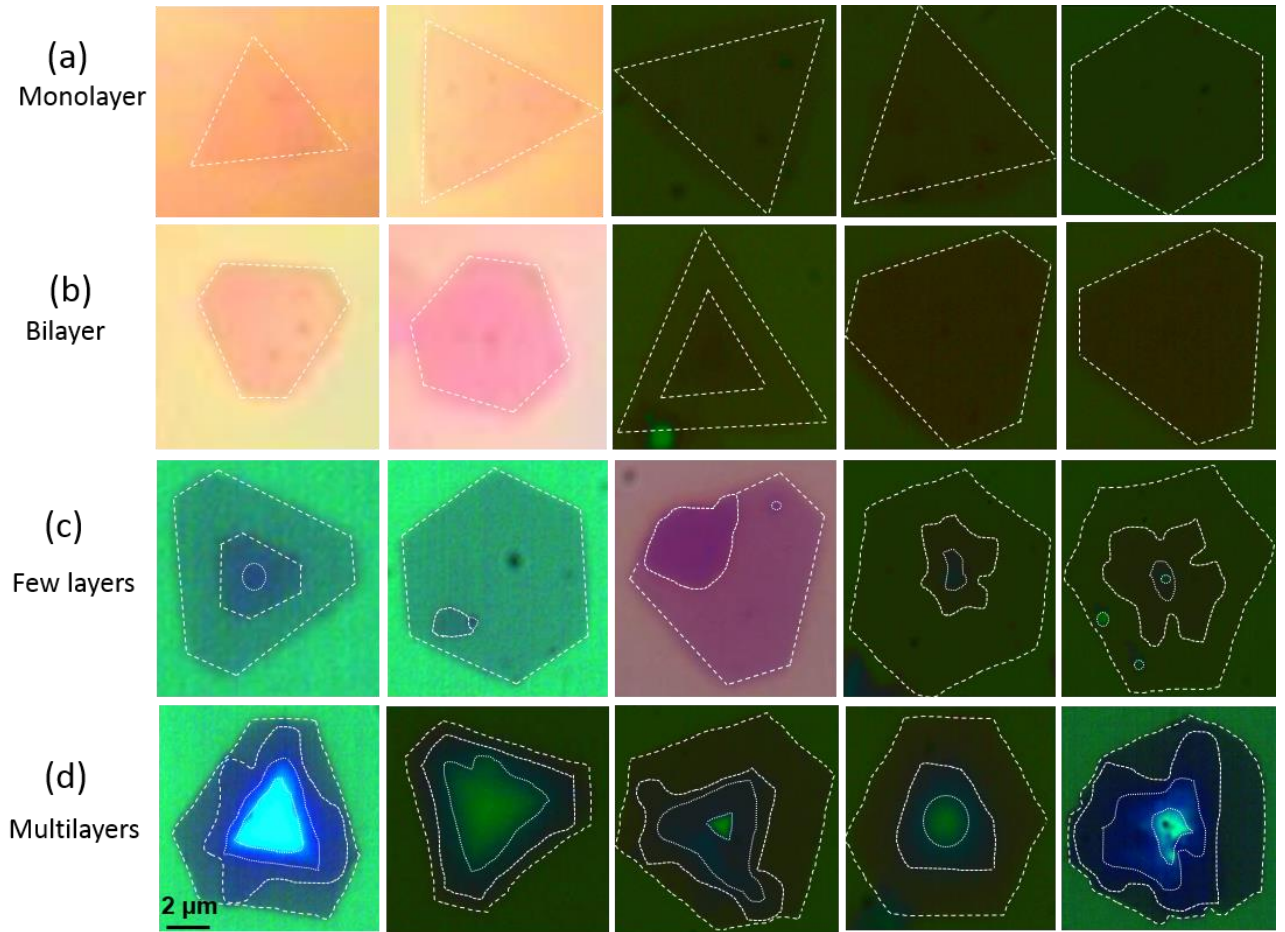

**Fig. S1 Representative optical images of CVD grown WS<sub>2</sub> flakes with variable thickness on 300nm SiO<sub>2</sub>/Si substrates.** (a) monolayer WS<sub>2</sub> marked inside the triangle and hexagon region shows single contrast throughout the whole surface. (b) bilayer WS<sub>2</sub> flakes exit either in single contrast in hexagonal shape and dual contrast in triangular shape as shown inside the marked region. The single contrast region is a result of complete bilayer with twist angle (0°), where two individual layers are merged together and the intensity of the contrast is stronger than monolayer region (a). (c) few layer flakes are represented by different color contrast inside the marked regions. The first layer exists in hexagonal shape and the successive second layer, third layer and sometimes fourth layer grow epitaxially on the top of the base layer with arbitrary shape. (d) multilayer WS<sub>2</sub>, in which more than 5-10 layers grow on the top of first base layer as shown inside the marked region. The top marked region containing an illuminated contrast contains several layers. The scale bar is same for all the panel.

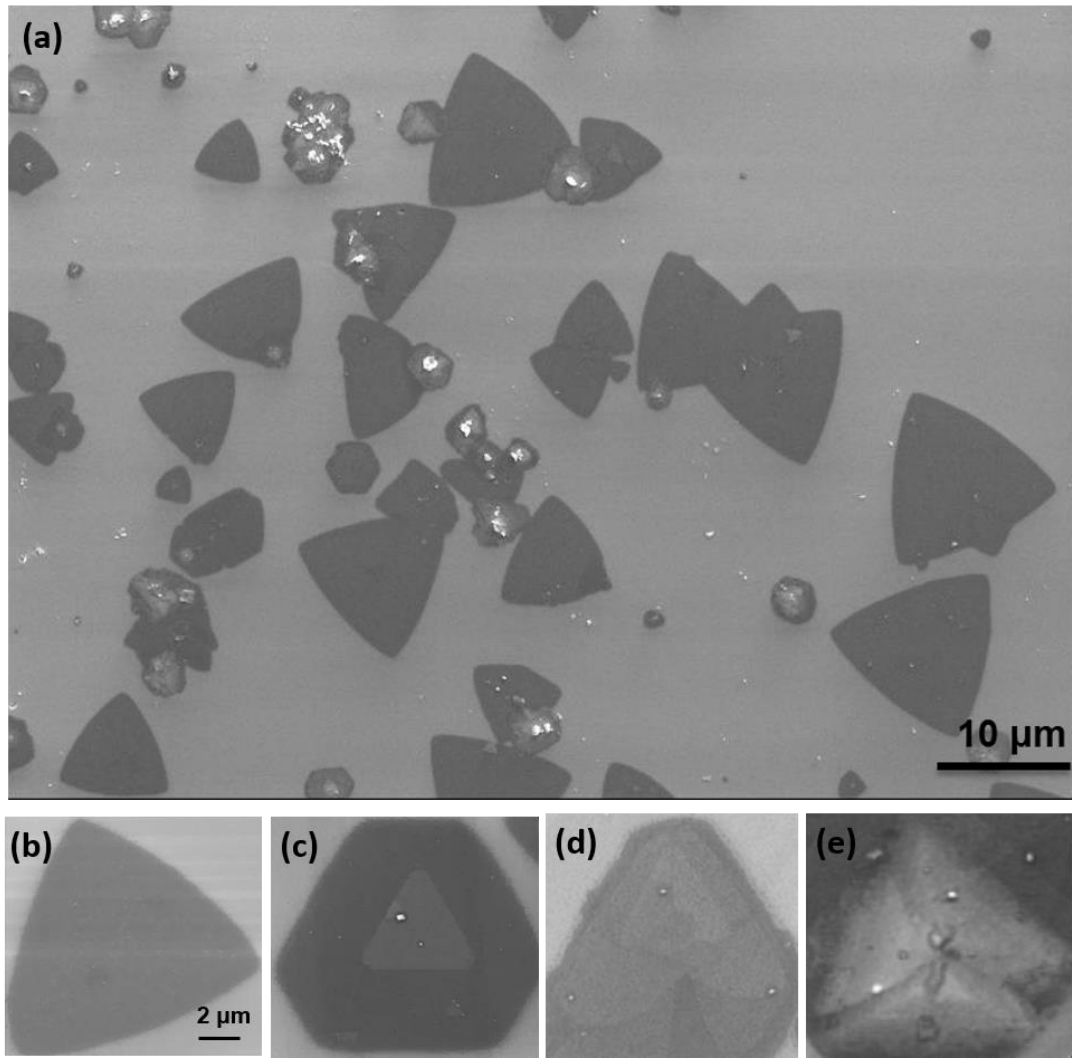

**Fig. S2 SEM images of CVD grown WS<sub>2</sub> on 300nm SiO<sub>2</sub>/Si substrate.** (a) SEM image of selected region of the sample containing monolayer to bulk WS<sub>2</sub> flakes. (b-e) representative individual monolayer, bilayer, few layer and bulk WS<sub>2</sub> grains. Monolayer shows a single contrast throughout the whole surface. In the case of bilayer (b) the second layer nucleates from the center of the first layer and expands in all directions. The domain size of the second layer is either less than the first layer or same, regarded as complete bilayer (panel b, Fig. S1). In both the cases, the twist angle between the top layer and bottom layer is 0°. (d) few layer contains 3-5 layers and (e) bulk contains more than 5 layers as observed from the optical contrasts. The Figs in b-e share the same scale bar.

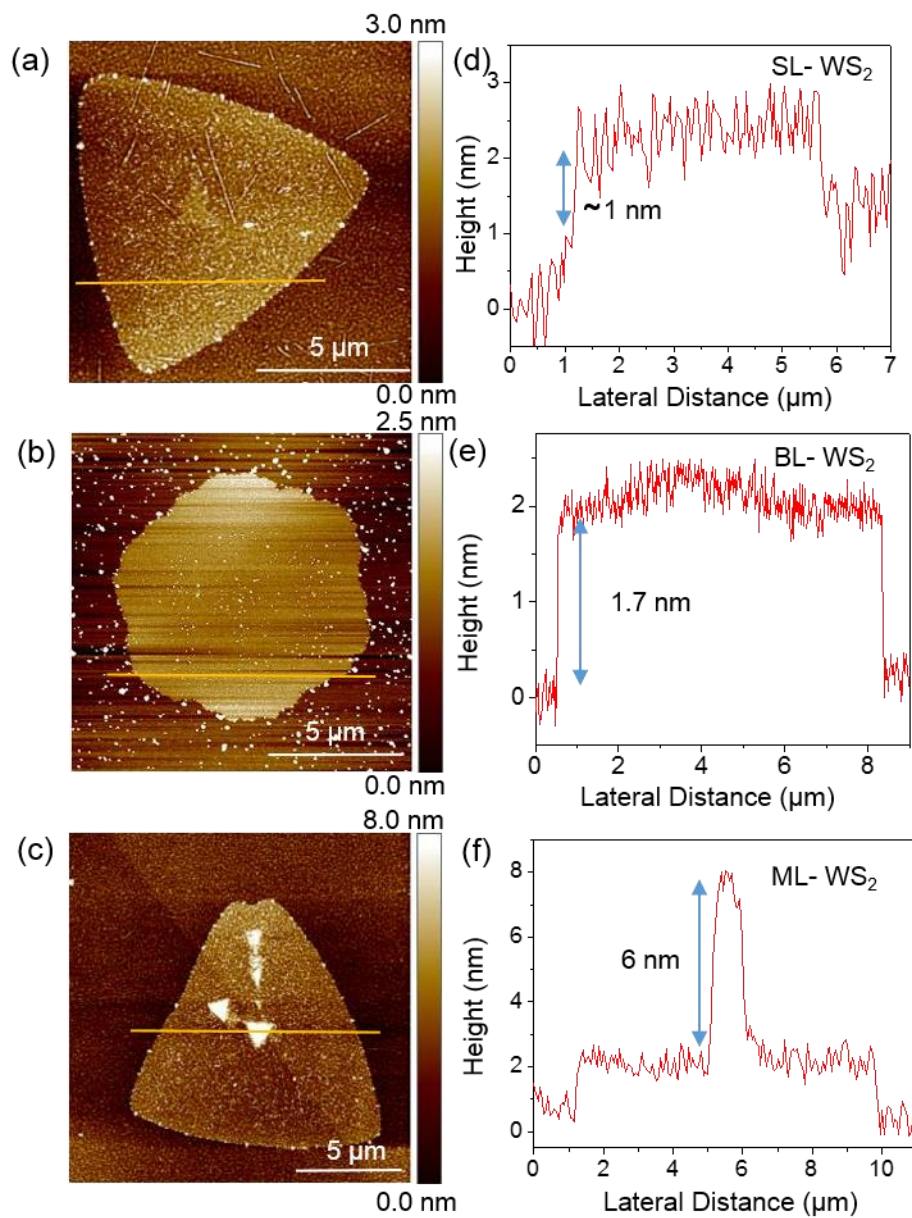

**Fig. S3 AFM images and height profiles of WS<sub>2</sub> layers.** A height of 1 nm, 1.7 nm and 6 nm in the marked region along y-axis revealing the positions of one layer, two layer and multilayer WS<sub>2</sub>.

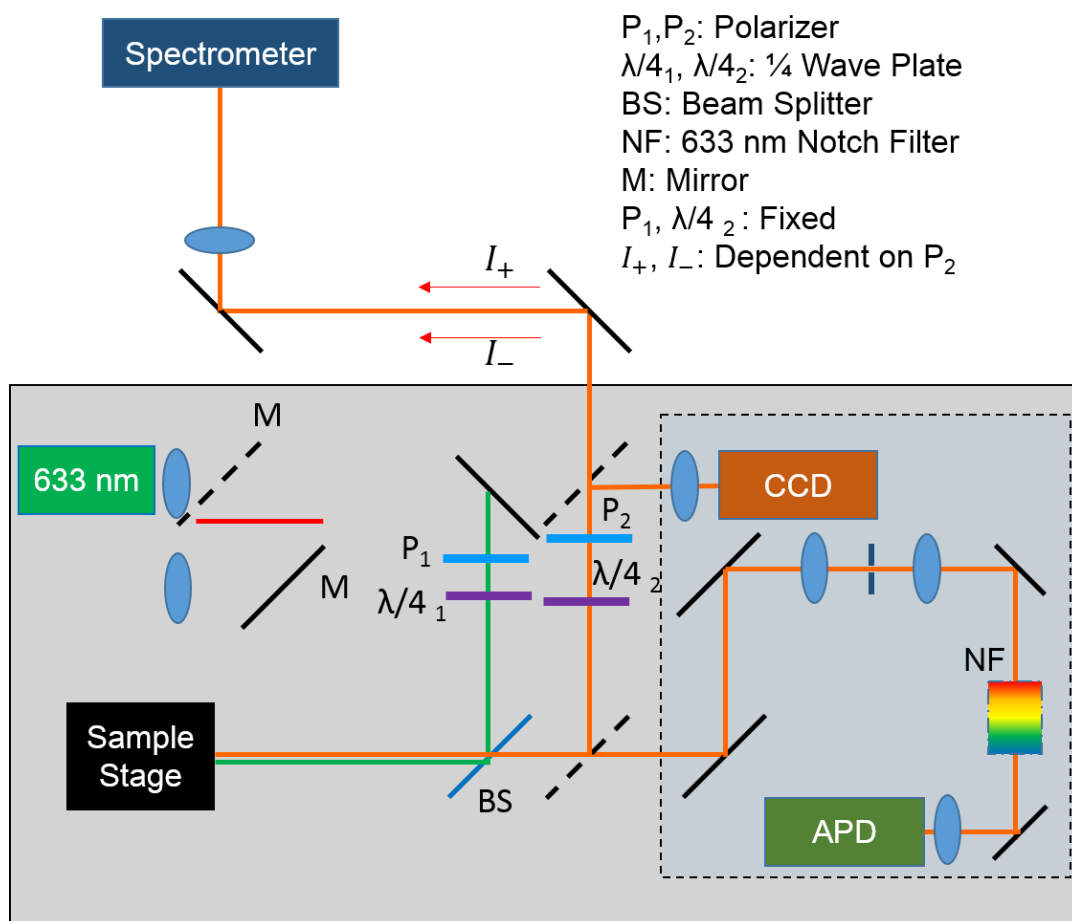

**Fig. S4 Schematic of homemade confocal-like microscopic set-up used for room temperature polarization resolved photoluminescence measurement.**  $I(+)$  and  $I(-)$  denote the intensity of the two orthogonally polarized beams casted in the CCD, for both right handed circular excited ( $\sigma+$ ) and left handed circular excited ( $\sigma-$ ) PL signal. The helicity of the circular polarization could be monitored by its attitude on the CCD image.

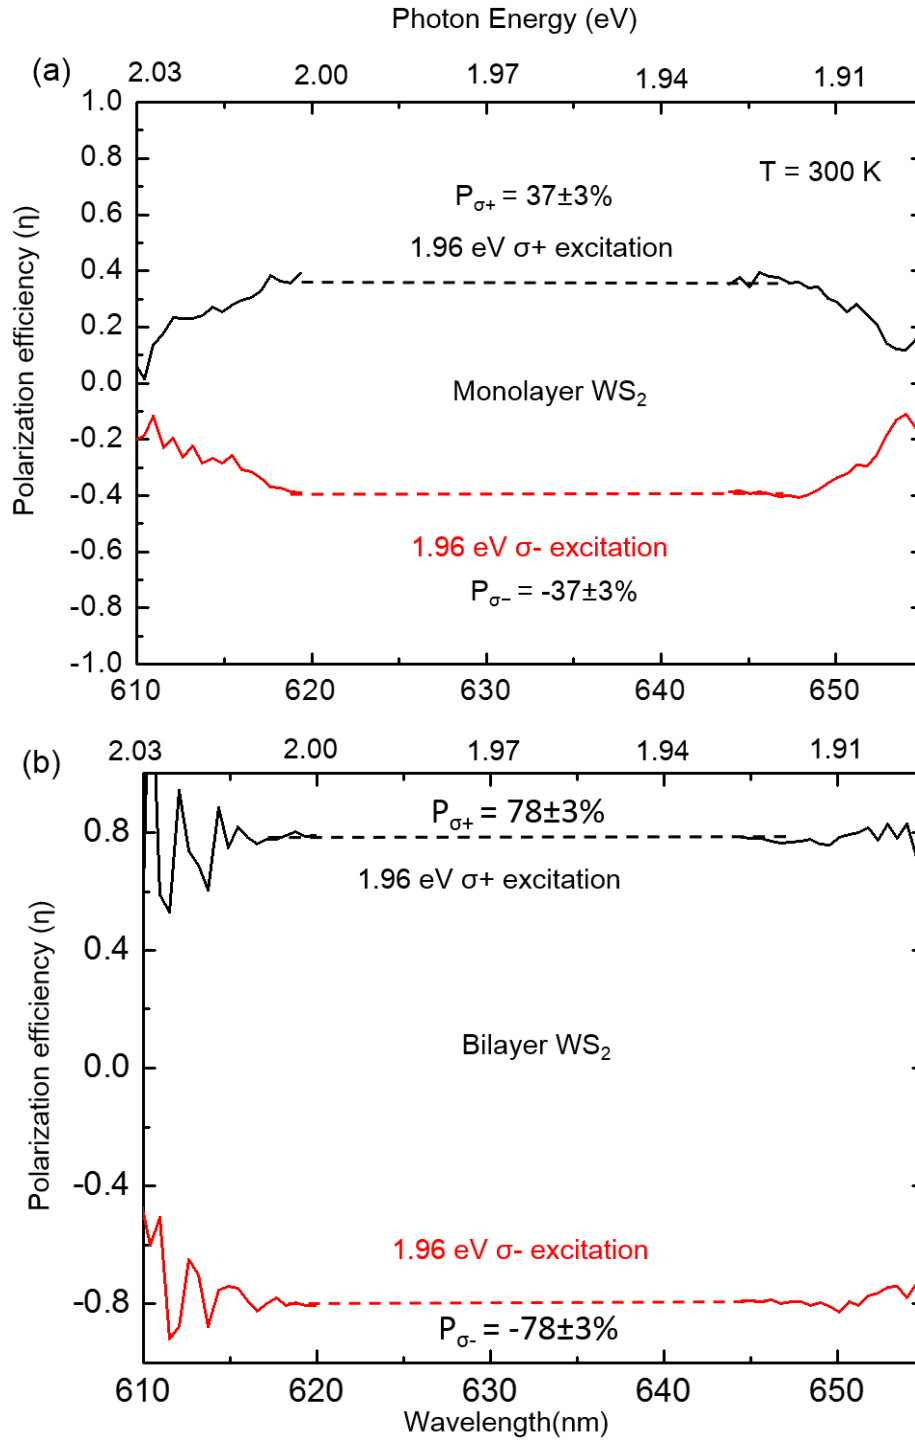

**Fig. S5 Polarized luminescence spectra from other monolayer and bilayer WS<sub>2</sub> flakes.**

Polarization efficiency vs. photon energies for another (a) monolayer and (b) bilayer WS<sub>2</sub> flakes on the same sample. The polarization efficiency is found to be  $37 \pm 3\%$  for monolayer and  $78 \pm 3\%$  for bilayer.

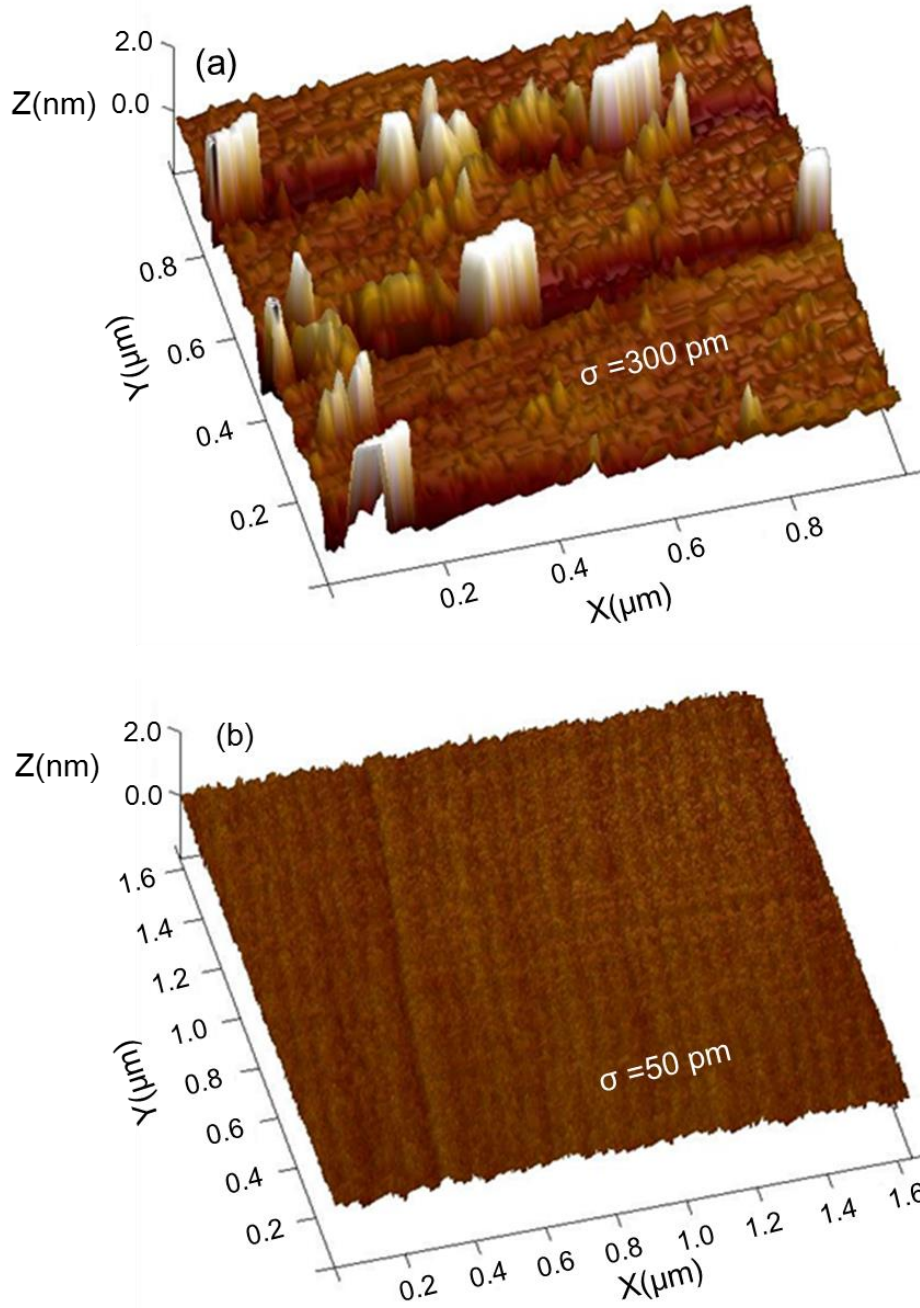

**Fig. S6 Morphology of growth substrates.** (a) AFM image of 300nm SiO<sub>2</sub>/Si used here as the growth substrate. The surface roughness is around 300 pm excluding some add particles/scratches. (b) AFM image of c-plane sapphire substrate. The surface is relatively smooth with surface roughness of 50 pm.
